# Supplementary material
Source: PubMed Central journal article supplement (PMC5875315)
Supplement: jamacardiol-e180405-s001.pdf [file jamacardiol-e180405-s001.pdf]

## Supplementary Online Content

Butt JH, Xian Y, Peterson ED, et al. Long-term thromboembolism risk in patients with postoperative atrial fibrillation after coronary artery bypass graft surgery and patients with nonvalvular atrial fibrillation. *JAMA Cardiol*. Published online March 28, 2018.  
doi:10.1001/jamacardio.2018.0405

**eTable 1.** ICD-8 and ICD-10 codes

**eTable 2.** ATC codes

**eTable 3.** OAC initiation within 30 days after the index date according to CHA2DS2-VASc in patients developing POAF following CABG and NVAF

**eTable 4.** Baseline characteristics of patients developing POAF following CABG and NVAF

**eTable 5.** Baseline characteristics of patients developing and not developing POAF following CABG

**eFigure 1.** OAC initiation within 30 days after the index date according to year of surgery or diagnosis in patients developing POAF following CABG and NVAF

**eFigure 2.** Long-term outcomes in patients developing POAF following CABG and NVAF

This supplementary material has been provided by the authors to give readers additional information about their work.

**eTable 1. ICD-8 and -10 codes**

| Comorbidity/outcomes                          | ICD-8 and ICD-10 codes                                                                                                                                                                                                                                                                            |
|-----------------------------------------------|---------------------------------------------------------------------------------------------------------------------------------------------------------------------------------------------------------------------------------------------------------------------------------------------------|
| Valvular disease                              | ICD-10: I05, I06, I080A, I081A-I083A, Z952, Z954<br>ICD-8: 4240, 4241, 39509, 39608, 39609, 39500-39502, 39600-39604                                                                                                                                                                              |
| Ischemic heart disease                        | ICD-10: I20-I25<br>ICD-8: 410-414                                                                                                                                                                                                                                                                 |
| Heart failure                                 | ICD-10: I42, I50, J81, I110, I130, I132<br>ICD-8: 425, 428, 4270, 4271                                                                                                                                                                                                                            |
| Atrial fibrillation                           | ICD-10: I48<br>ICD-8: 4274                                                                                                                                                                                                                                                                        |
| Ischemic stroke                               | ICD-10: I63, I64<br>ICD-8: 433, 434                                                                                                                                                                                                                                                               |
| Transient cerebral ischemia                   | ICD-10: G45<br>ICD-8: 435                                                                                                                                                                                                                                                                         |
| Thrombosis or embolism in peripheral arteries | ICD-10: I74<br>ICD-8: 444                                                                                                                                                                                                                                                                         |
| Peripheral vascular disease                   | ICD-10: I70, I74<br>ICD-8: 443                                                                                                                                                                                                                                                                    |
| Coagulopathy                                  | ICD-10: D66-D69<br>ICD-8: 286                                                                                                                                                                                                                                                                     |
| Deep vein thrombosis                          | ICD-10: I801-I803, I808, I809, I821-I823, I828, I829<br>ICD-8: 45100, 45108, 45109, 45190, 45199, 45300, 45302, 45303, 45304, 45309                                                                                                                                                               |
| Pulmonary embolism                            | ICD-10: I26<br>ICD-8: 450                                                                                                                                                                                                                                                                         |
| Bleeding                                      | ICD-10: I60-I62, N02, R04, R31, D62, H052A, G951A, S368D, K298A, K228F, I864A, K638B, K638C, K838F, K868G, I312, H313, H356, H431, H450, S064-S066, J942, D500, K250, K252, K254, K256, K260, K262, K264, K266, K270, K272, K274, K276, K280, K282, K284, K286, K290, K625, K661, K920-K922, I850 |
| Malignancy                                    | ICD-10: C00-C97<br>ICD-8: 140-209                                                                                                                                                                                                                                                                 |
| Chronic renal disease                         | ICD-10: E102, E112, E132, E142, I120, N02-N08, N11, N12, N14, N18, N19, N26, N158-N160, N162-N164, N168, M300, M313, M319, M321B, Q612, Q613, Q615, Q619, T858, T859, Z992<br>ICD-8: 403, 404, 581-584, 25002, 40039, 59009, 59320, 75310, 75311, 75319                                           |
| Chronic obstructive pulmonary disease         | ICD-10: J42-J44<br>ICD-8: 490-492                                                                                                                                                                                                                                                                 |

|                      |                                                                                                                                      |
|----------------------|--------------------------------------------------------------------------------------------------------------------------------------|
|                      |                                                                                                                                      |
| Liver disease        | ICD-10: B15-B19, K70-K77, C22, I982, Z944, D684C, Q618A<br>ICD-8: 070, 155, 571-573                                                  |
| Alcohol abuse        | ICD-10: E244, E52, F10, G312, G621, G721, I426, K292, K70, K860, L27A, O354, T51, Z714, Z721<br>ICD-8: 291, 303, 57109, 57110, 57710 |
| Orthopedic fractures | ICD-10: S42, S52, S62, S72, S82, S92                                                                                                 |

ICD, International Classification of Diseases

**eTable 2. ATC codes**

| Pharmacotherapy                       | ATC codes                          |
|---------------------------------------|------------------------------------|
| Beta-blockers                         | C07, C09BX                         |
| Calcium channel blockers              | C08, C07F, C09BB, C09DB            |
| Renin-angiotensin-system inhibitors   | C09                                |
| Vasodilator drugs                     | C02DB, C02DD, C02DG                |
| Antiadrenergic drugs                  | C02A, C02B, C02C                   |
| Thiazides                             | C03A, C07B, C07D, C09XA52, C03EA01 |
| Loop diuretics                        | C03C, C03EB01, C03EB02             |
| Spirolactone                          | C03DA01                            |
| Statins                               | C10AA                              |
| Anti-diabetics                        | A10                                |
| Aspirin                               | B01AC06, N02BA01                   |
| ADP-receptor inhibitors               | B01AC04, B01AC22, B01AC24          |
| Dipyridamole                          | B01AC07                            |
| Vitamin K antagonists                 | B01AA03, B01AA04                   |
| Non-vitamin K antagonists             | B01AE07, B01AF01, B01AF02          |
| Drugs used in alcohol dependence      | N07BB                              |
| Non-steroidal anti-inflammatory drugs | M01A                               |

ATC, Anatomical Therapeutic Chemical; ADP, adenosine diphosphate

**eTable 3. OAC initiation within 30 days after the index date according to CHA<sub>2</sub>DS<sub>2</sub>-VASc in patients developing POAF following CABG and NVAF**

| CHA <sub>2</sub> DS <sub>2</sub> -VASc | NVAF           |                   | POAF           |                   |
|----------------------------------------|----------------|-------------------|----------------|-------------------|
|                                        | OAC initiation | No OAC initiation | OAC initiation | No OAC initiation |
| 1                                      | 39.5%          | 60.5%             | 6.8%           | 93.2%             |
| 2                                      | 45.1%          | 54.9%             | 5.3%           | 94.7%             |
| 3                                      | 43.9%          | 56.1%             | 9.7%           | 90.3%             |
| ≥ 4                                    | 41.8%          | 58.2%             | 10.1%          | 89.9%             |

NVAF, non-valvular atrial fibrillation; POAF, postoperative atrial fibrillation; CABG, coronary artery bypass grafting; OAC, oral anticoagulation

**eTable 4. Baseline characteristics of patients developing POAF following CABG and NVAF**

| Characteristics                                                    | NVAF<br>N=3808 | POAF<br>N=1904 | P-value |
|--------------------------------------------------------------------|----------------|----------------|---------|
| Demographics                                                       |                |                |         |
| Age (median [interquartile range])                                 | 69 (64-74)     | 69 (64-74)     | N/A     |
| Male, N (%)                                                        | 3158 (82.9)    | 1579 (82.9)    | N/A     |
| Comorbidities, N (%)                                               |                |                |         |
| Ischemic heart disease                                             | 3808 (100)     | 1904 (100)     | N/A     |
| Heart failure                                                      | 528 (13.9)     | 264 (13.9)     | N/A     |
| Thromboembolism                                                    | 300 (7.9)      | 150 (7.9)      | N/A     |
| Peripheral vascular disease                                        | 230 (6.0)      | 115 (6.0)      | N/A     |
| Hypertension                                                       | 1926 (50.6)    | 963 (50.6)     | N/A     |
| Coagulopathy                                                       | 16 (0.4)       | 6 (0.3)        | 0.55    |
| Bleeding                                                           | 511 (13.4)     | 188 (9.9)      | < 0.001 |
| Diabetes                                                           | 468 (12.3)     | 234 (12.3)     | N/A     |
| Malignancy                                                         | 567 (14.9)     | 177 (9.3)      | < 0.001 |
| Chronic renal disease                                              | 224 (5.9)      | 79 (4.2)       | 0.005   |
| Chronic obstructive pulmonary disease                              | 562 (14.8)     | 119 (6.3)      | < 0.001 |
| Liver disease                                                      | 105 (2.8)      | 21 (1.1)       | < 0.001 |
| Alcohol abuse                                                      | 251 (6.6)      | 57 (3.0)       | < 0.001 |
| Concomitant medical treatment, N (%)                               |                |                |         |
| Statins                                                            | 1837 (48.2)    | 1184 (62.2)    | < 0.001 |
| Aspirin                                                            | 2296 (60.3)    | 1160 (60.9)    | 0.65    |
| ADP-receptor inhibitors                                            | 418 (11.0)     | 196 (10.3)     | 0.43    |
| Dipyridamole                                                       | 110 (2.9)      | 49 (2.6)       | 0.49    |
| NSAID                                                              | 798 (21.0)     | 325 (17.1)     | < 0.001 |
| Risk scores                                                        |                |                |         |
| CHA <sub>2</sub> DS <sub>2</sub> -VASc (mean [standard deviation]) | 3.1 (1.4)      | 3.1 (1.4)      | N/A     |
| CHADS <sub>2</sub> (mean [standard deviation])                     | 1.2 (1.1)      | 1.2 (1.1)      | N/A     |
| HAS-BLED (mean [standard deviation])                               | 2.3 (1.2)      | 2.2 (1.1)      | 0.002   |

NVAF, non-valvular atrial fibrillation; POAF, postoperative atrial fibrillation; IHD, ischemic heart disease; ADP, adenosine diphosphate; NSAID, non-steroidal anti-inflammatory drugs; N/A, not applicable

**eTable 5. Baseline characteristics of patients developing and not developing POAF following CABG**

| Characteristics                                                    | No POAF<br>N=4964 | POAF<br>N=2157 | P-value |
|--------------------------------------------------------------------|-------------------|----------------|---------|
| Demographics                                                       |                   |                |         |
| Age (median [interquartile range])                                 | 64 (57-70)        | 68 (63-74)     | < 0.001 |
| Male, N (%)                                                        | 4075 (82.1)       | 1776 (82.3)    | 0.80    |
| Comorbidities, N (%)                                               |                   |                |         |
| Ischemic heart disease                                             | 4964 (100)        | 2157 (100)     | N/A     |
| Heart failure                                                      | 791 (15.9)        | 371 (17.2)     | 0.18    |
| Thromboembolism                                                    | 459 (9.3)         | 228 (10.6)     | 0.08    |
| Peripheral vascular disease                                        | 270 (5.4)         | 135 (6.3)      | 0.17    |
| Hypertension                                                       | 2240 (45.1)       | 1099 (51.0)    | < 0.001 |
| Coagulopathy                                                       | 20 (0.4)          | 8 (0.4)        | 0.84    |
| Bleeding                                                           | 418 (8.4)         | 217 (10.1)     | 0.03    |
| Diabetes                                                           | 1073 (21.6)       | 387 (17.9)     | < 0.001 |
| Malignancy                                                         | 419 (8.4)         | 195 (9.0)      | 0.41    |
| Chronic renal disease                                              | 215 (4.3)         | 95 (4.4)       | 0.89    |
| Chronic obstructive pulmonary disease                              | 259 (5.2)         | 133 (6.2)      | 0.11    |
| Liver disease                                                      | 92 (1.9)          | 31 (1.4)       | 0.22    |
| Alcohol abuse                                                      | 236 (4.8)         | 77 (3.6)       | 0.03    |
| Concomitant medical treatment, N (%)                               |                   |                |         |
| Statins                                                            | 3239 (65.3)       | 1356 (62.9)    | 0.05    |
| Aspirin                                                            | 3108 (62.6)       | 1324 (61.4)    | 0.33    |
| ADP-receptor inhibitors                                            | 635 (12.8)        | 232 (10.8)     | 0.02    |
| Dipyridamole                                                       | 121 (2.4)         | 64 (3.0)       | 0.20    |
| NSAID                                                              | 815 (16.4)        | 372 (17.3)     | 0.39    |
| Risk scores                                                        |                   |                |         |
| CHA <sub>2</sub> DS <sub>2</sub> -VASc (mean [standard deviation]) | 2.8 (1.5)         | 3.2 (1.4)      | < 0.001 |
| CHADS <sub>2</sub> (mean [standard deviation])                     | 1.1 (1.2)         | 1.3 (1.2)      | < 0.001 |
| HAS-BLED (mean [standard deviation])                               | 1.9 (1.2)         | 2.2 (1.1)      | < 0.001 |

POAF, postoperative atrial fibrillation; IHD, ischemic heart disease; ADP, adenosine diphosphate; NSAID, non-steroidal anti-inflammatory drugs; N/A, not applicable

**eFigure 1. OAC initiation within 30 days after the index date according to year of surgery or diagnosis in patients developing POAF following CABG and NVAF**

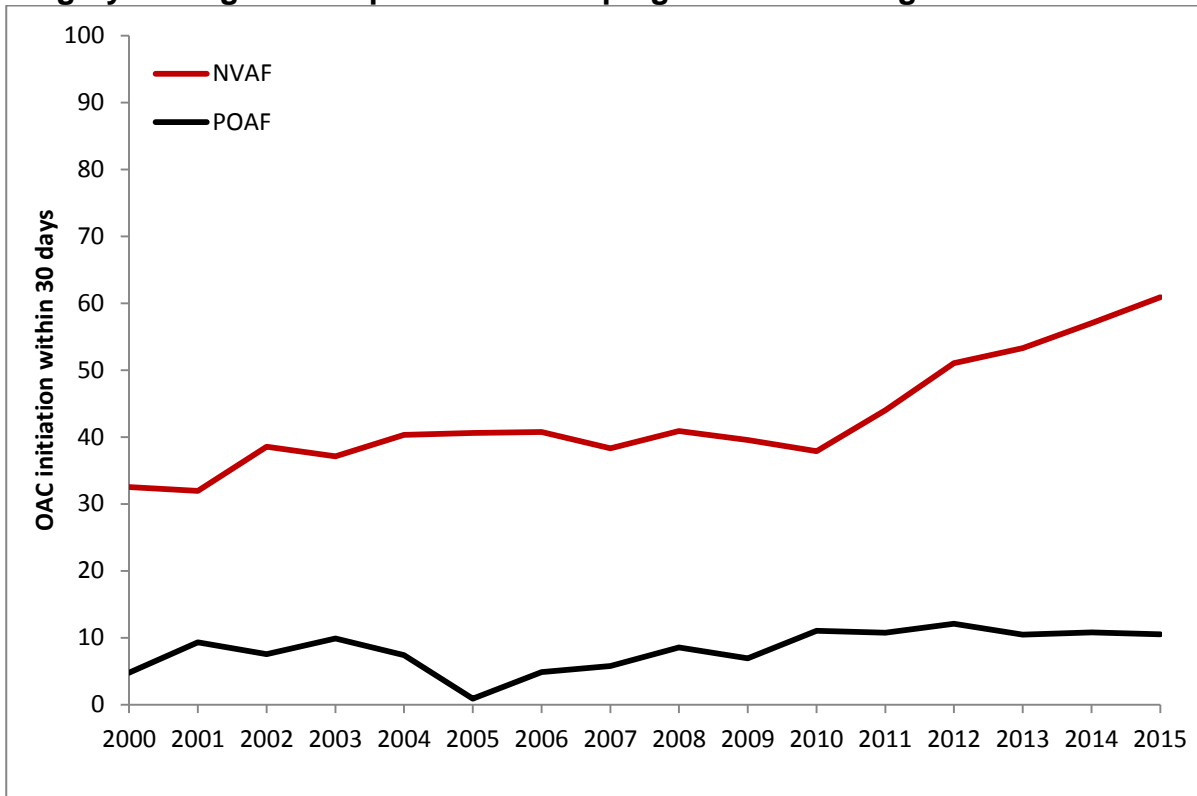

NVAF, non-valvular atrial fibrillation; POAF, postoperative atrial fibrillation; CABG, coronary artery bypass grafting; OAC, oral anticoagulation



**eFigure 2. Long-term outcomes in patients developing POAF following CABG and NVAF**

**a) Cumulative incidence of thromboembolism (composite of ischemic stroke, transient cerebral ischemia, and thrombosis or embolism in peripheral arteries)**

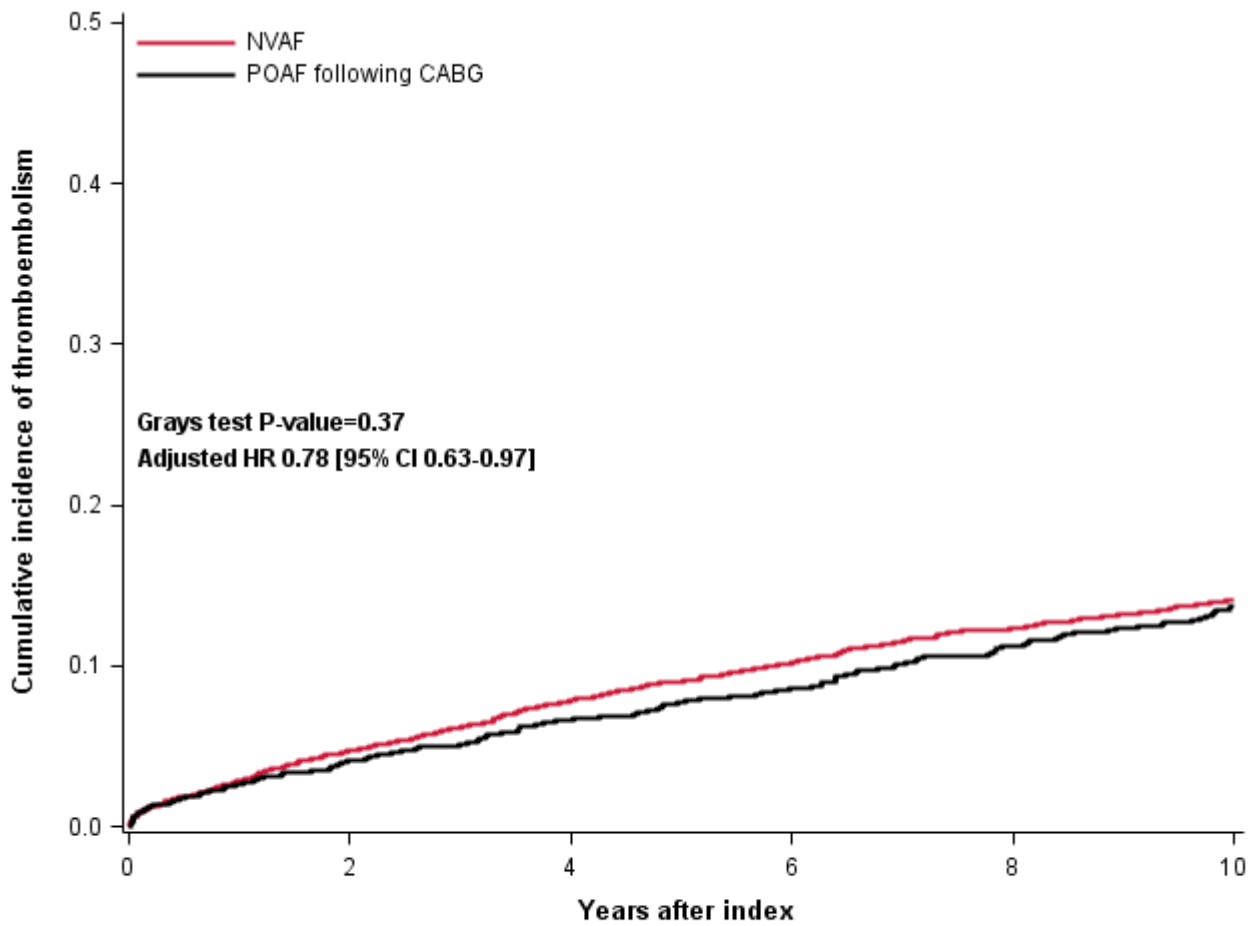

**Patients at risk**

|             |             |             |             |             |            |            |
|-------------|-------------|-------------|-------------|-------------|------------|------------|
| <b>NVAF</b> | <b>3808</b> | <b>2638</b> | <b>1865</b> | <b>1327</b> | <b>941</b> | <b>624</b> |
| <b>POAF</b> | <b>1904</b> | <b>1484</b> | <b>1125</b> | <b>837</b>  | <b>603</b> | <b>395</b> |

NVAF, non-valvular atrial fibrillation; POAF, postoperative atrial fibrillation; CABG, coronary artery bypass grafting; IHD, ischemic heart disease; HR, hazard ratio; CI, confidence intervals

**b) Kaplan-Meier curves for death**

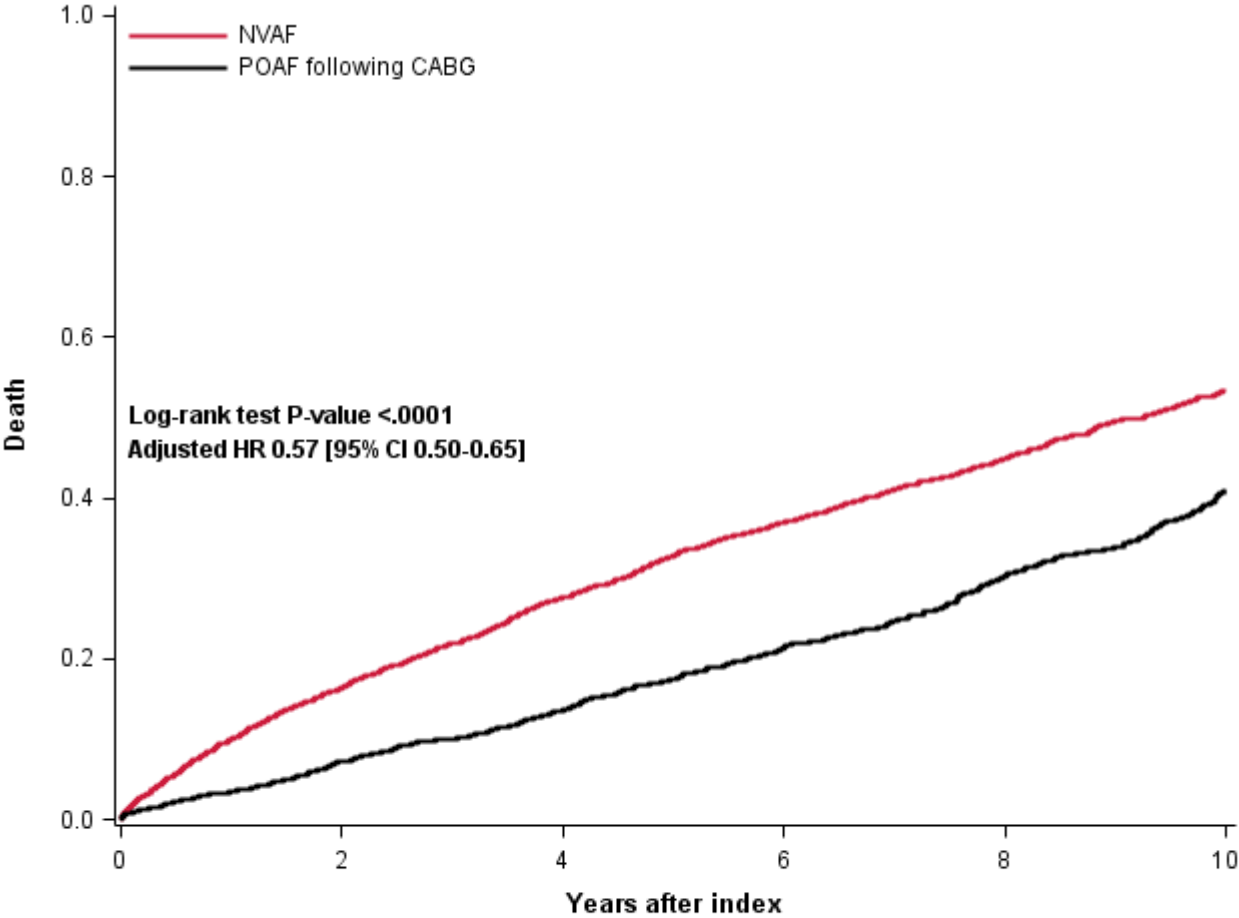

**Patients at risk**

|             |             |             |             |             |             |            |
|-------------|-------------|-------------|-------------|-------------|-------------|------------|
| <b>NVAf</b> | <b>3808</b> | <b>2754</b> | <b>1992</b> | <b>1449</b> | <b>1048</b> | <b>708</b> |
| <b>POAF</b> | <b>1904</b> | <b>1533</b> | <b>1187</b> | <b>903</b>  | <b>664</b>  | <b>443</b> |

NVAf, non-valvular atrial fibrillation; POAF, postoperative atrial fibrillation; CABG, coronary artery bypass grafting; IHD, ischemic heart disease; HR, hazard ratio; CI, confidence intervals

**c) Cumulative incidence of recurrent AF hospitalization**

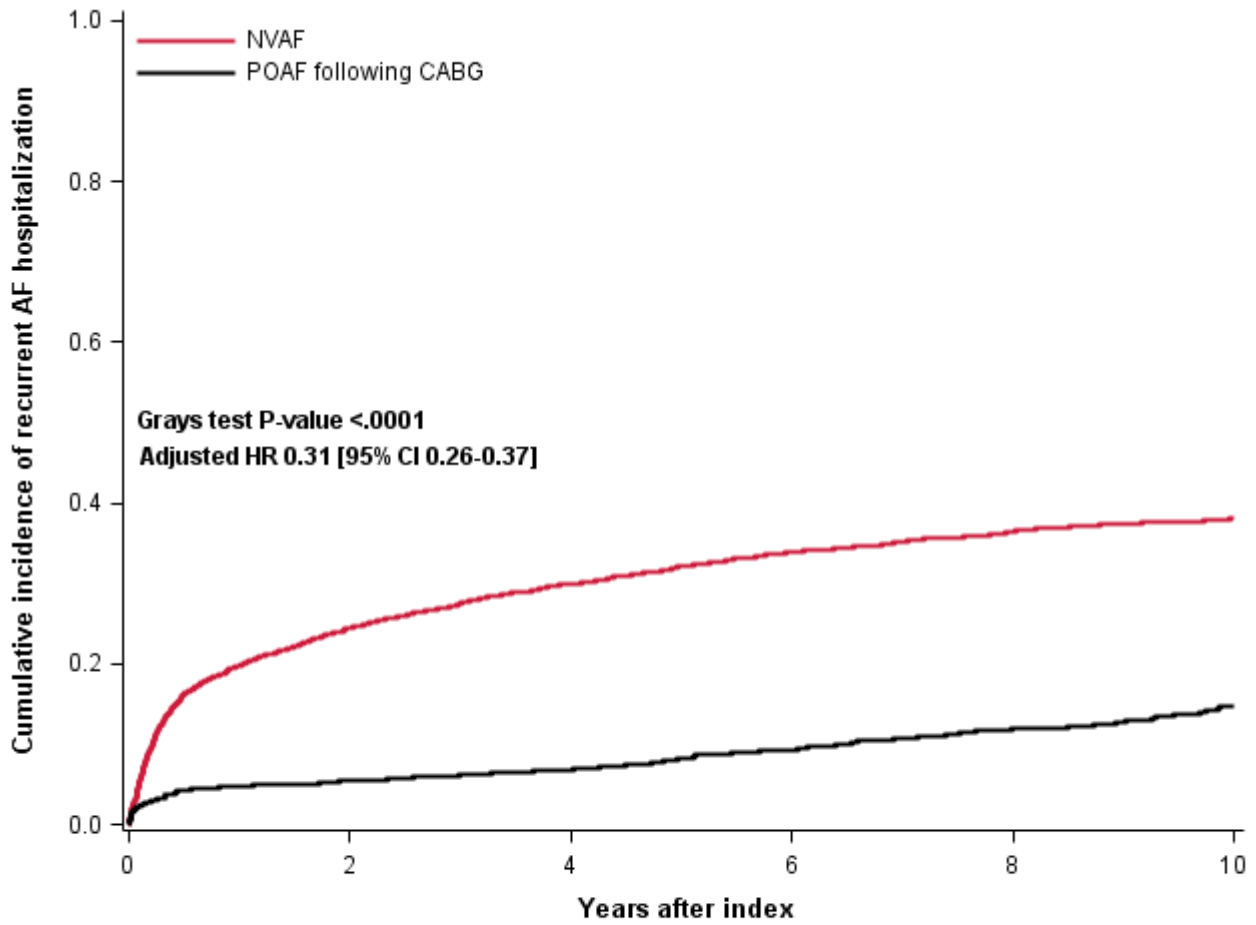

**Patients at risk**

|             |             |             |             |            |            |            |
|-------------|-------------|-------------|-------------|------------|------------|------------|
| <b>NVAf</b> | <b>3808</b> | <b>2035</b> | <b>1330</b> | <b>876</b> | <b>586</b> | <b>369</b> |
| <b>POAF</b> | <b>1904</b> | <b>1448</b> | <b>1110</b> | <b>826</b> | <b>586</b> | <b>369</b> |

AF, atrial fibrillation; NVAf, non-valvular atrial fibrillation; POAF, postoperative atrial fibrillation; CABG, coronary artery bypass grafting; IHD, ischemic heart disease; HR, hazard ratio; CI, confidence intervals
